# Supplementary material
Source: bioRxiv or medRxiv preprint supplement (https://www.biorxiv.org/highwire/filestream/26548/field_highwire_adjunct_files/0/093351-1.pdf)

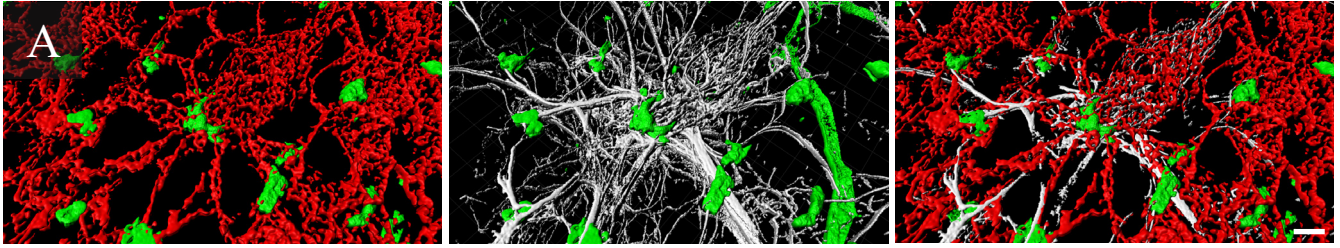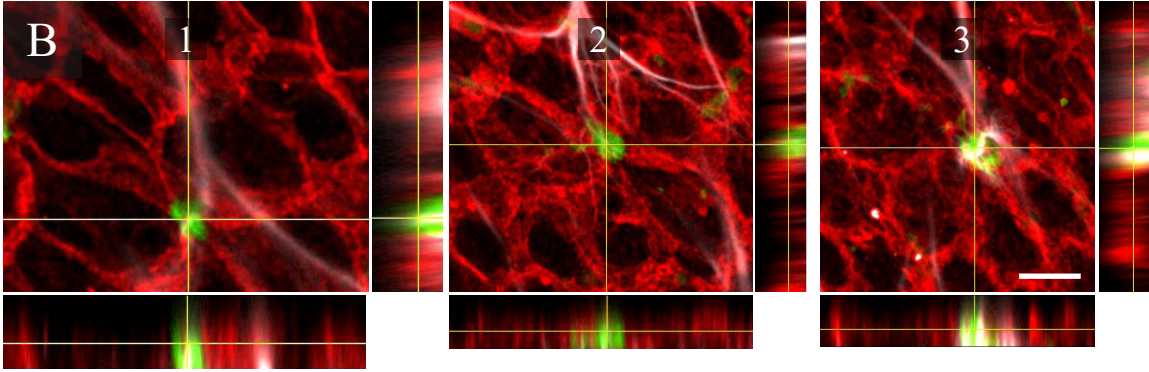

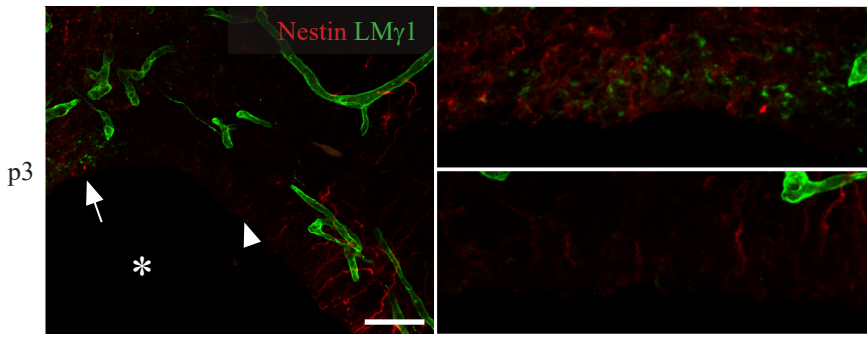

Tie2Cre

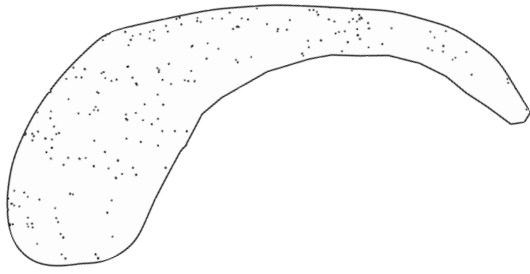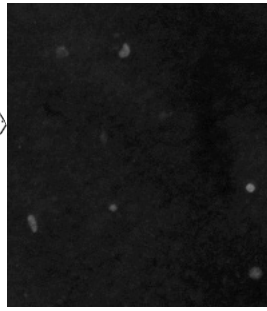

Lama4<sup>-/-</sup>

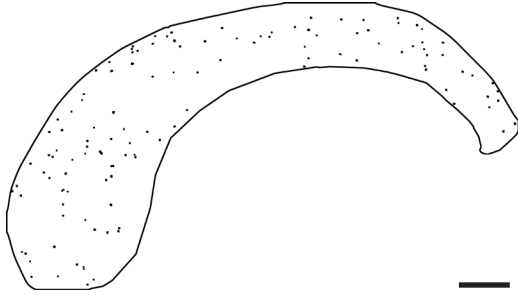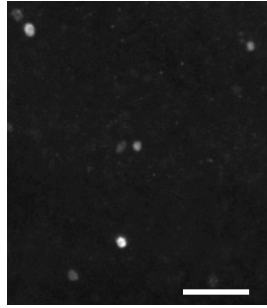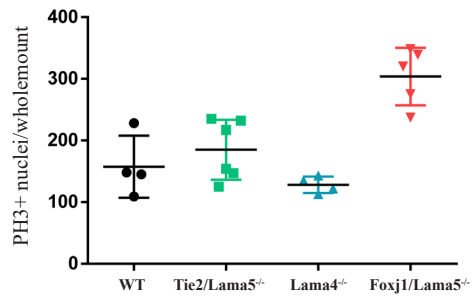

Supplement: Supplementary file [file 093351-1.pdf]
